# Supplementary material for: Dexmedetomidine modulates macrophage polarization by inhibiting ferroptosis to exert protective effects on intestinal barrier function in sepsis
Source: Research Square preprint supplement (doi:10.21203/rs.3.rs-6742785/v1), 2025-06-29
Supplement: Supplementary file 1 [file 42339d9e8325191751aa75f8.docx]

**Fig1-F**


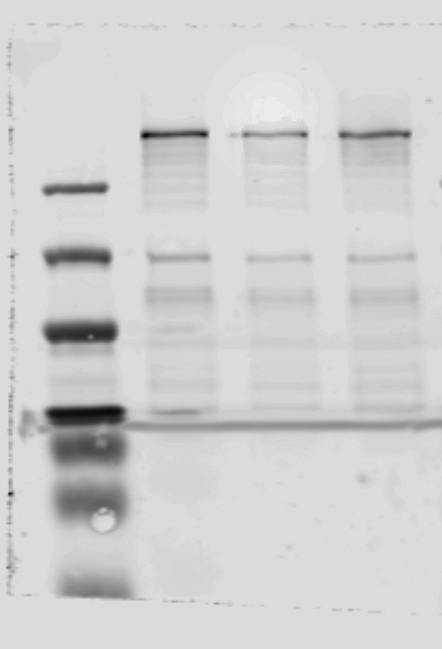

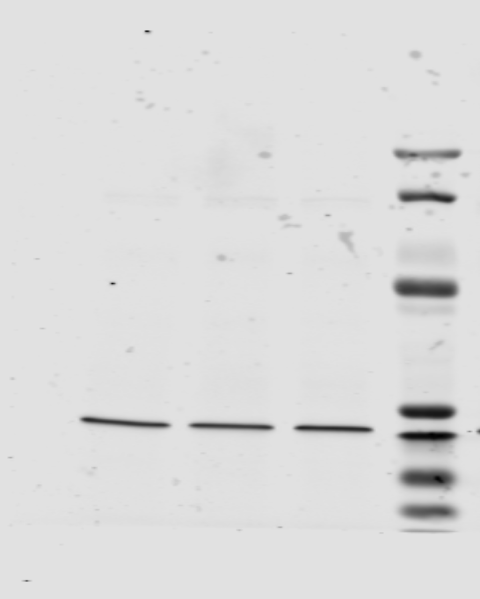

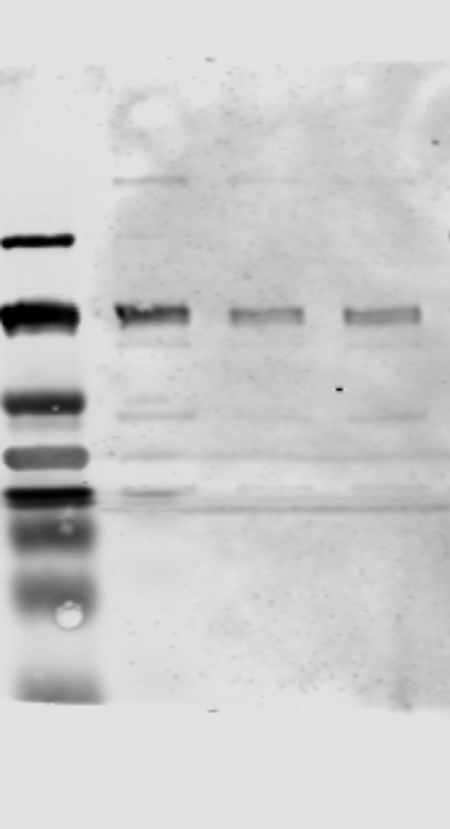


Occludin

65 kDa

ZO-1

220 kDa

Control

LPS

Dex

Control

LPS

Dex

43 kDa

β-actin

Dex

LPS

Control

**
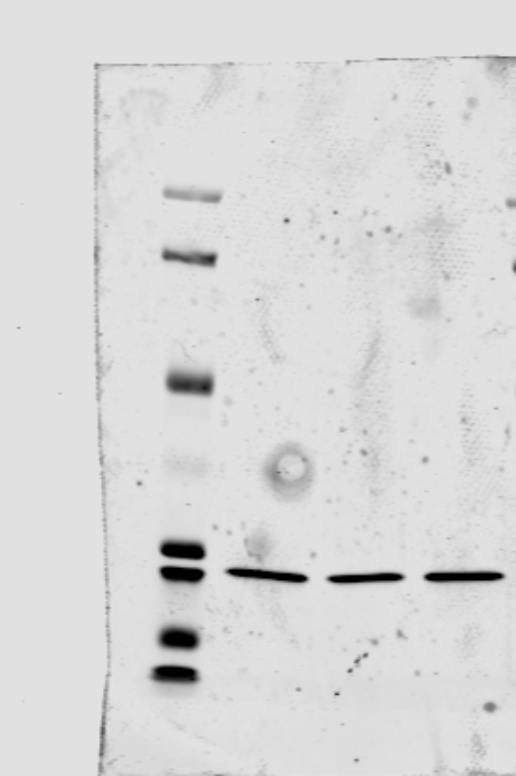
Fig4-C**

Dex

LPS

Control

43 kDa

β-actin

Control

LPS

Dex

**
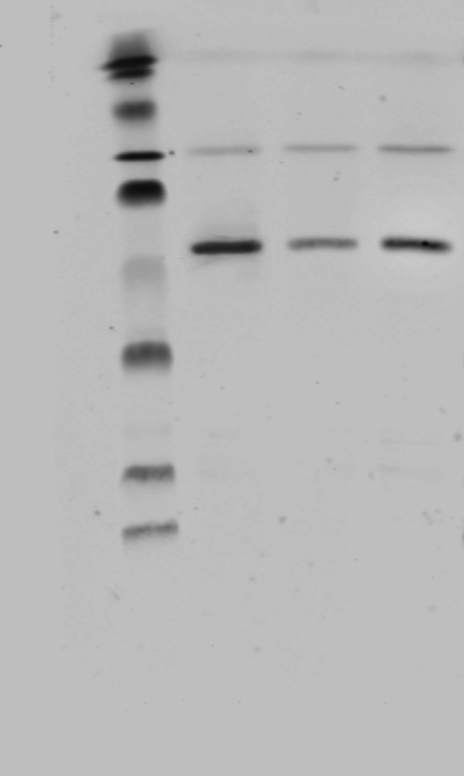
**

55 kDa

XCT

**‘**

**
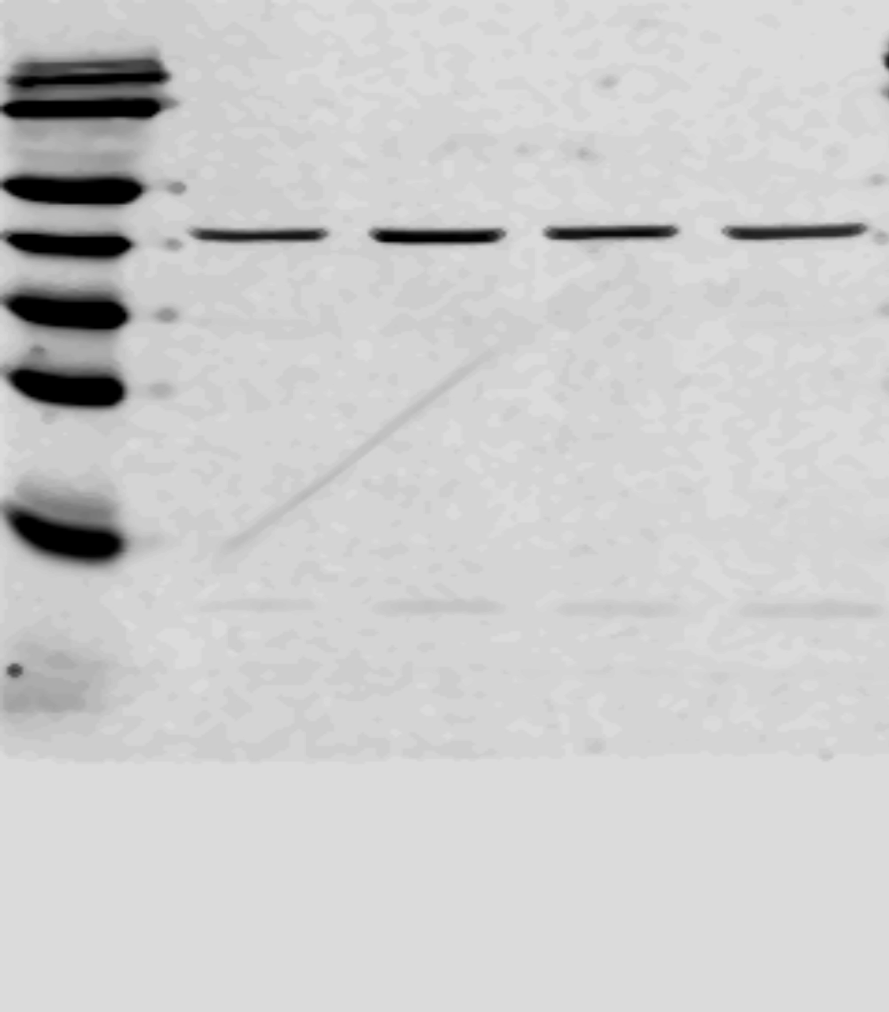
Fig4-C**

Control

LPS

LPS+Dex

LPS+Dex+SAS

43 kDa

β-actin

**
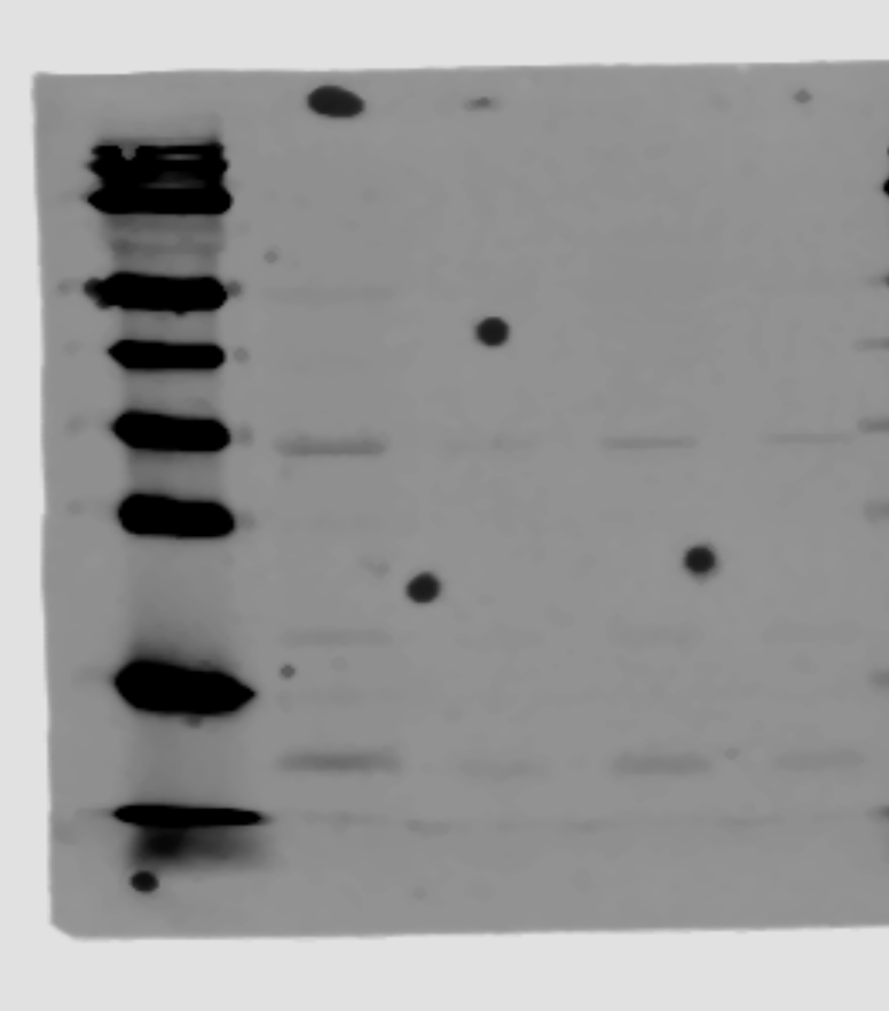
**

LPS+Dex

Control

LPS

LPS+Dex+SAS

22 kDa

GPX4
